# Supplementary material
Source: PubMed Central journal article supplement (PMC2988652)
Supplement: NIHMS244103-supplement-1_si_001.pdf [file NIHMS244103-supplement-1_si_001.pdf]

## **Supporting Information**

Channel-Opening Kinetic Mechanism for Human Wild-Type GluK2 and the  
M867I Mutant Kainate Receptor<sup>†</sup>

Yan Han, Congzhou Wang, Jae Seon Park, and Li Niu\*

*Department of Chemistry and Center for Neuroscience Research, University at Albany, SUNY,  
Albany, New York 12222*

**Table S1:** Kinetic characterization of rat and human GluK2 receptors

| Publication and References                                  | Patch Configuration     | Glutamate (mM) | $k_{des}$ (s <sup>-1</sup> ) | $EC_{50}$ (mM) |
|-------------------------------------------------------------|-------------------------|----------------|------------------------------|----------------|
| This study with rat GluK2                                   | Whole-cell              | 2-5            | 230 ± 32                     | 0.26 ± 0.02    |
| Paternain et al. (1998) <i>Neuropharm.</i> 37, 1249-59.     | Whole-cell              | 3              | 81 ± 3                       | 0.762 ± 0.052  |
| Swanson et al. (1997) <i>Neuron</i> 19, 913-26.             | Whole-cell              | 1              | 244 ± 12                     | —              |
| Barberis et al. (2008) <i>J Neurosci</i> 28, 6402-6.        | Whole-cell              | 1              | 222 ± 20                     | 0.427 ± 0.023  |
| Vivithanaporn et al. (2007) <i>J Neurosci</i> 27, 10423-33. | Whole-cell              | 10             | 238 ± 11                     | —              |
| Paternain et al. (2000) <i>J Neurosci</i> 20, 196-205.      | Whole-cell              | 10             | 92 ± 4.8                     | 0.898          |
| Zhang et al. (2008) <i>Mol Pharmacol</i> 74, 1163-9.        | Whole-cell              | 10             | 189 ± 7                      | 0.083 ± 0.022  |
| Raymond et al. (1993) <i>Nature</i> 361, 637-41.            | Whole-cell              | —              | —                            | 0.273 ± 0.073  |
| Heckmann et al. (1996) <i>Biophys J.</i> 71, 1743-50.       | Outside-out             | 1-100          | 100 – 250 <sup>a</sup>       | ~0.5           |
| Traynelis et al. (1997) <i>J Physiol</i> 503.3, 513-31.     | Outside-out             | 10             | 230 ± 25                     | 0.5            |
| Bufler et al. (1997) <i>Neurosci Lett.</i> 221, 173-6.      | Outside-out             | 10             | 112 – 385 <sup>a</sup>       | —              |
| Chaudhry et al. (2009) <i>PNAS USA</i> 106, 12329-34.       | Outside-out             | 10             | 165 ± 14                     | —              |
| Wong et al. (2007) <i>J Neurosci</i> 27, 6800-9.            | Whole-cell <sup>b</sup> | 10             | 253 ± 11                     | —              |
| This study with human GluK2                                 | Whole-cell              | 2-5            | 119 ± 20                     | 0.15 ± 0.01    |
| Barbon et al. (2008) <i>Neurosci Lett</i> 434, 77-82.       | Whole-cell              | 1              | 167 ± 8 <sup>c</sup>         | —              |

Note:

<sup>a</sup>the authors reported a range of rate constants.

<sup>b</sup>all of the authors used HEK-293 cells except Wong et al. who used tsA201 cells.

<sup>c</sup>these authors measured the desensitization rate constant on human GluK2c isoform, whereas we used human GluK2a in our study.

**Table S2:** Nonlinear Fitting with Fixed  $k_{cl}$  Value for Wild-Type and M867I Mutant human GluK2

| Fitting method | Initial values             |                          |               |     | outputs                  |               |     |       |
|----------------|----------------------------|--------------------------|---------------|-----|--------------------------|---------------|-----|-------|
|                | $k_{cl}^a$<br>( $s^{-1}$ ) | $k_{op}$<br>( $s^{-1}$ ) | $K_1$<br>(mM) | $n$ | $k_{op}$<br>( $s^{-1}$ ) | $K_1$<br>(mM) | $n$ | $R^2$ |
| Simplex        | 310                        | 500                      | 1             | 1   | 1790                     | 0.29          | 1.3 | 0.86  |
| Newton         | 310                        | 500                      | 1             | 1   | 1874                     | 0.19          | 1.7 | 0.88  |
| Simplex        | 310                        | 500                      | 0.5           | 1   | 1727                     | 0.17          | 1.8 | 0.87  |
| Simplex        | 310                        | 500                      | 0.1           | 1   | 1357                     | 0.07          | 2.8 | 0.88  |
| Simplex        | 310                        | 500                      | 0.2           | 2.5 | 1516                     | 0.1           | 2.3 | 0.87  |
| Simplex        | 310                        | 500                      | 0.2           | 4   | 1788                     | 0.18          | 1.7 | 0.87  |
| Simplex        | 310                        | 1000                     | 0.5           | 1.5 | 1739                     | 0.18          | 1.7 | 0.87  |
| Newton         | 310                        | 1000                     | 0.5           | 1.5 | 1721                     | 0.18          | 1.7 | 0.87  |
| Simplex        | 310                        | 1000                     | 0.8           | 1.5 | 1759                     | 0.27          | 1.3 | 0.86  |
| Simplex        | 310                        | 1000                     | 0.1           | 1.5 | 1340                     | 0.1           | 2.1 | 0.87  |
| Simplex        | 310                        | 1000                     | 0.2           | 3   | 1598                     | 0.17          | 1.7 | 0.87  |
| Simplex        | 310                        | 1500                     | 0.3           | 2   | 1964                     | 0.29          | 1.4 | 0.86  |
| Newton         | 310                        | 1500                     | 0.3           | 2   | 1601                     | 0.11          | 2.3 | 0.87  |
| Simplex        | 310                        | 1500                     | 0.1           | 2   | 1417                     | 0.1           | 2.2 | 0.87  |
| Simplex        | 310                        | 1500                     | 0.2           | 4   | 2125                     | 0.2           | 1.9 | 0.86  |
| Simplex        | 310                        | 2000                     | 0.2           | 3   | 2476                     | 0.25          | 1.8 | 0.86  |
| Newton         | 310                        | 2000                     | 0.2           | 3   | 1818                     | 0.18          | 1.8 | 0.87  |
| Simplex        | 310                        | 2000                     | 0.2           | 1   | 1702                     | 0.23          | 1.4 | 0.86  |
| Simplex        | 310                        | 2000                     | 0.2           | 2   | 2100                     | 0.21          | 1.8 | 0.86  |
| Newton         | 310                        | 2000                     | 0.8           | 2   | 1895                     | 0.2           | 1.7 | 0.87  |
| Newton         | 310                        | 2000                     | 0.8           | 4   | 2100                     | 0.21          | 1.8 | 0.87  |
| Simplex        | 310                        | 4000                     | 0.1           | 4   | 1507                     | 0.1           | 2.3 | 0.88  |
| Newton         | 310                        | 4000                     | 0.1           | 4   | 1484                     | 0.08          | 2.7 | 0.88  |
| Newton         | 310                        | 4000                     | 0.5           | 4   | 1940                     | 0.21          | 1.7 | 0.87  |
| Newton         | 310                        | 4000                     | 0.5           | 1   | 1557                     | 0.12          | 2.1 | 0.87  |
| Simplex        | 310                        | 5000                     | 0.2           | 2.5 | 1546                     | 0.11          | 2.2 | 0.87  |
| Newton         | 310                        | 5000                     | 0.2           | 2.5 | 1652                     | 0.16          | 1.8 | 0.87  |
| Newton         | 310                        | 5000                     | 0.2           | 5   | 1652                     | 0.16          | 1.8 | 0.87  |
| Newton         | 310                        | 5000                     | 0.2           | 1   | 1741                     | 0.15          | 1.9 | 0.87  |
| Newton         | 310                        | 5000                     | 0.2           | 2   | 1601                     | 0.11          | 2.3 | 0.87  |
| Newton         | 310                        | 5000                     | 0.1           | 2   | 1601                     | 0.11          | 2.3 | 0.87  |
| Newton         | 310                        | 5000                     | 0.8           | 2   | 1498                     | 0.1           | 2.4 | 0.88  |
| Newton         | 310                        | 5000                     | 2             | 2   | 1482                     | 0.1           | 2.4 | 0.88  |

<sup>a</sup>  $k_{cl}$  is fixed at  $310 s^{-1}$  (see the text).

The table below summarizes the average value for each parameter.

|         | $k_{cl}^a$<br>( $s^{-1}$ ) | $k_{op}$<br>( $\times 10^3 s^{-1}$ ) | $K_1$<br>(mM) | $n$ |
|---------|----------------------------|--------------------------------------|---------------|-----|
| Average | 310                        | 1.7                                  | 0.17          | 1.9 |

**Table S3:** Nonlinear Fitting with Fixed  $k_{cl}$  Value for Wild-Type Rat GluK2

| Fitting method | Initial values             |                          |               |     | outputs                  |               |     |       |
|----------------|----------------------------|--------------------------|---------------|-----|--------------------------|---------------|-----|-------|
|                | $k_{cl}^a$<br>( $s^{-1}$ ) | $k_{op}$<br>( $s^{-1}$ ) | $K_1$<br>(mM) | $n$ | $k_{op}$<br>( $s^{-1}$ ) | $K_1$<br>(mM) | $n$ | $R^2$ |
| Simplex        | 400                        | 3000                     | 0.1           | 1   | 5394                     | 0.24          | 2.1 | 0.96  |
| Newton         | 400                        | 3000                     | 0.2           | 2   | 5560                     | 0.27          | 2.0 | 0.96  |
| Simplex        | 400                        | 3000                     | 0.3           | 1   | 6046                     | 0.3           | 2.0 | 0.96  |
| Simplex        | 400                        | 3000                     | 0.5           | 2   | 5501                     | 0.24          | 2.1 | 0.96  |
| Simplex        | 400                        | 3000                     | 0.3           | 3   | 5286                     | 0.25          | 2.0 | 0.96  |
| Newton         | 400                        | 3000                     | 0.4           | 4   | 6565                     | 0.33          | 1.9 | 0.95  |
| Newton         | 400                        | 4000                     | 0.1           | 1   | 9303                     | 0.6           | 1.6 | 0.95  |
| Newton         | 400                        | 4000                     | 0.2           | 2   | 5556                     | 0.24          | 2.2 | 0.96  |
| Simplex        | 400                        | 4000                     | 0.3           | 1   | 4166                     | 0.15          | 2.5 | 0.96  |
| Simplex        | 400                        | 4000                     | 0.5           | 2   | 5898                     | 0.34          | 1.8 | 0.95  |
| Simplex        | 400                        | 4000                     | 0.3           | 3   | 5482                     | 0.26          | 2.0 | 0.96  |
| Simplex        | 400                        | 5000                     | 0.4           | 4   | 9611                     | 0.45          | 1.9 | 0.94  |
| Newton         | 400                        | 5000                     | 0.1           | 1   | 4711                     | 0.18          | 2.4 | 0.96  |
| Simplex        | 400                        | 5000                     | 0.2           | 2   | 4670                     | 0.21          | 2.1 | 0.96  |
| Newton         | 400                        | 5000                     | 0.3           | 1   | 5724                     | 0.25          | 2.1 | 0.96  |
| Simplex        | 400                        | 6500                     | 0.5           | 2   | 7530                     | 0.49          | 1.6 | 0.95  |
| Simplex        | 400                        | 6500                     | 0.3           | 3   | 7719                     | 0.31          | 2.2 | 0.95  |
| Newton         | 400                        | 6500                     | 0.4           | 4   | 5554                     | 0.27          | 2.0 | 0.96  |
| Newton         | 400                        | 6500                     | 0.1           | 1   | 5736                     | 0.29          | 2.0 | 0.96  |
| Simplex        | 400                        | 6500                     | 0.2           | 2   | 5264                     | 0.2           | 2.4 | 0.96  |
| Newton         | 400                        | 7500                     | 0.3           | 1   | 5724                     | 0.25          | 2.1 | 0.96  |
| Simplex        | 400                        | 7500                     | 0.5           | 2   | 7500                     | 0.34          | 2.0 | 0.95  |
| Newton         | 400                        | 7500                     | 0.3           | 3   | 5178                     | 0.23          | 2.1 | 0.96  |
| Newton         | 400                        | 7500                     | 0.4           | 4   | 7209                     | 0.41          | 1.8 | 0.95  |
| Newton         | 400                        | 7500                     | 0.1           | 1   | 6426                     | 0.36          | 1.8 | 0.95  |
| Simplex        | 400                        | 8500                     | 0.2           | 2   | 6357                     | 0.24          | 2.3 | 0.95  |
| Simplex        | 400                        | 8500                     | 0.3           | 1   | 7044                     | 0.41          | 1.8 | 0.95  |
| Simplex        | 400                        | 8500                     | 0.5           | 2   | 7044                     | 0.41          | 1.8 | 0.95  |
| Newton         | 400                        | 8500                     | 0.3           | 3   | 5410                     | 0.25          | 2.1 | 0.96  |
| Newton         | 400                        | 8500                     | 0.4           | 4   | 6157                     | 0.33          | 1.9 | 0.96  |

<sup>a</sup>  $k_{cl}$  is fixed at  $400 s^{-1}$  (see the text).

The table below summarizes the average value for each parameter.

|         | $k_{cl}^a$<br>( $s^{-1}$ ) | $k_{op}$<br>( $s^{-1}$ ) | $K_1$<br>(mM) | $n$ |
|---------|----------------------------|--------------------------|---------------|-----|
| Average | 400                        | 6200                     | 0.30          | 2.0 |

**Table S4:** Fitting with  $k_{cl}$  and  $K_I$  Fixed for Wild-Type and M867I Mutant human GluK2

| Fitting method | Initial values                   |               |                                |     | outputs                        |     |                |
|----------------|----------------------------------|---------------|--------------------------------|-----|--------------------------------|-----|----------------|
|                | $k_{cl}^a$<br>(s <sup>-1</sup> ) | $K_I$<br>(mM) | $k_{op}$<br>(s <sup>-1</sup> ) | $n$ | $k_{op}$<br>(s <sup>-1</sup> ) | $n$ | R <sup>2</sup> |
| Simplex        | 310                              | 0.17          | 500                            | 1   | 1719                           | 1.8 | 0.87           |
| Newton         | 310                              | 0.17          | 500                            | 2   | 1725                           | 1.8 | 0.87           |
| Simplex        | 310                              | 0.17          | 500                            | 4   | 1489                           | 1.6 | 0.86           |
| Newton         | 310                              | 0.17          | 1000                           | 1   | 1725                           | 1.8 | 0.87           |
| Simplex        | 310                              | 0.17          | 1000                           | 5   | 1477                           | 1.6 | 0.86           |
| Simplex        | 310                              | 0.17          | 2000                           | 2   | 2000                           | 2.0 | 0.86           |
| Newton         | 310                              | 0.17          | 2000                           | 4   | 1725                           | 1.8 | 0.87           |
| Simplex        | 310                              | 0.17          | 4000                           | 1   | 1708                           | 1.8 | 0.87           |
| Simplex        | 310                              | 0.17          | 4000                           | 4   | 2429                           | 2.3 | 0.83           |
| Simplex        | 310                              | 0.17          | 5000                           | 2   | 1785                           | 1.8 | 0.87           |
| Simplex        | 310                              | 0.17          | 5000                           | 3   | 2418                           | 2.3 | 0.83           |

The table below summarizes the average value for each parameter.

|         | $k_{cl}^a$<br>(s <sup>-1</sup> ) | $K_I^a$<br>(mM) | $k_{op}$<br>(s <sup>-1</sup> ) | $n$ |
|---------|----------------------------------|-----------------|--------------------------------|-----|
| Average | 310                              | 0.17            | 2000                           | 1.9 |

**Table S5:** Fitting with  $k_{cl}$  and  $K_I$  Fixed for Wild-Type Rat GluK2

| Fitting method | Initial values                   |               |                                |     | outputs                        |     |                |
|----------------|----------------------------------|---------------|--------------------------------|-----|--------------------------------|-----|----------------|
|                | $k_{cl}^a$<br>(s <sup>-1</sup> ) | $K_I$<br>(mM) | $k_{op}$<br>(s <sup>-1</sup> ) | $n$ | $k_{op}$<br>(s <sup>-1</sup> ) | $n$ | R <sup>2</sup> |
| Simplex        | 400                              | 0.30          | 3000                           | 1   | 6615                           | 2.0 | 0.95           |
| Newton         | 400                              | 0.30          | 3000                           | 2   | 6045                           | 2.0 | 0.96           |
| Simplex        | 400                              | 0.30          | 4000                           | 4   | 6066                           | 2.0 | 0.96           |
| Newton         | 400                              | 0.30          | 4000                           | 1   | 6045                           | 2.0 | 0.96           |
| Simplex        | 400                              | 0.30          | 5000                           | 5   | 6052                           | 2.0 | 0.96           |
| Simplex        | 400                              | 0.30          | 6500                           | 2   | 6734                           | 2.1 | 0.95           |
| Newton         | 400                              | 0.30          | 6500                           | 4   | 6045                           | 2.0 | 0.96           |
| Simplex        | 400                              | 0.30          | 7500                           | 1   | 6284                           | 2.0 | 0.95           |
| Simplex        | 400                              | 0.30          | 7500                           | 4   | 9703                           | 2.5 | 0.92           |
| Simplex        | 400                              | 0.30          | 8500                           | 2   | 7251                           | 2.1 | 0.95           |
| Simplex        | 400                              | 0.30          | 8500                           | 3   | 9617                           | 2.4 | 0.92           |

The table below summarizes the average value for each parameter.

|         | $k_{cl}^a$<br>(s <sup>-1</sup> ) | $K_I^a$<br>(mM) | $k_{op}$<br>(s <sup>-1</sup> ) | $n$ |
|---------|----------------------------------|-----------------|--------------------------------|-----|
| Average | 400                              | 0.30            | 7,000                          | 2.1 |

**FIGURE S1**

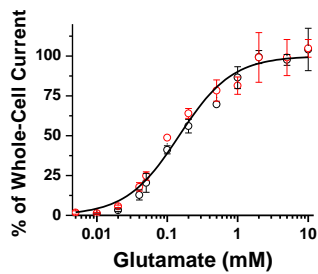

FIGURE S1. Fitting of dose-response relationship of the wild-type and mutant M867I human GluK2 to the Hill equation. Percentage of the whole-cell current of the wild-type and the mutant GluK2 as a function of glutamate concentration was obtained in the whole-cell recording. The black circles stand for the data of wild type hGluK2, and the red circles are from the mutant hGluK2 (M867I). Each data point is an average of at least three measurements from three different cells. The solid line is the best fit of the combined data based on Hill equation.  $EC_{50}$  of  $0.15 \pm 0.01$  mM and the Hill coefficient of  $1.13 \pm 0.09$  were obtained.

## FIGURE S2

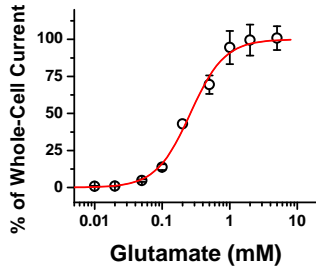

FIGURE S2. Fitting of dose-response relationship of the wild-type rGluK2 to the Hill equation. Percentage of the whole-cell current of the wild-type rGluK2 as a function of glutamate concentration was obtained by using the whole-cell recording. Each data point is an average of at least three measurements from three different cells. The solid line is the best fit of the data based on the Hill equation.  $EC_{50}$  of  $0.26 \pm 0.01$  mM and the Hill coefficient of  $1.71 \pm 0.14$  were obtained.



### FIGURE S3

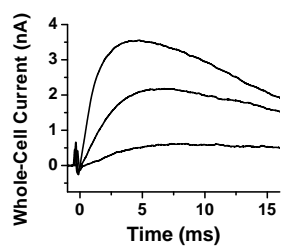

FIGURE S3. Raw laser-pulse photolysis traces of wild type human GluK2. All the traces are collected from the same cell. The laser pulse was triggered at time zero. The currents are shown reversed. From the top to the bottom, the glutamate concentrations are 0.30, 0.14 and 0.04 mM, and the  $k_{obs}$  are 962, 617 and 426  $s^{-1}$ . The current amplitudes are 3.54, 2.19 and 0.62 nA.
